# Supplementary material
Source: MDPI journal article supplement (https://www.mdpi.com/2073-4395/11/5/868)
Supplement: s1 [file s1]

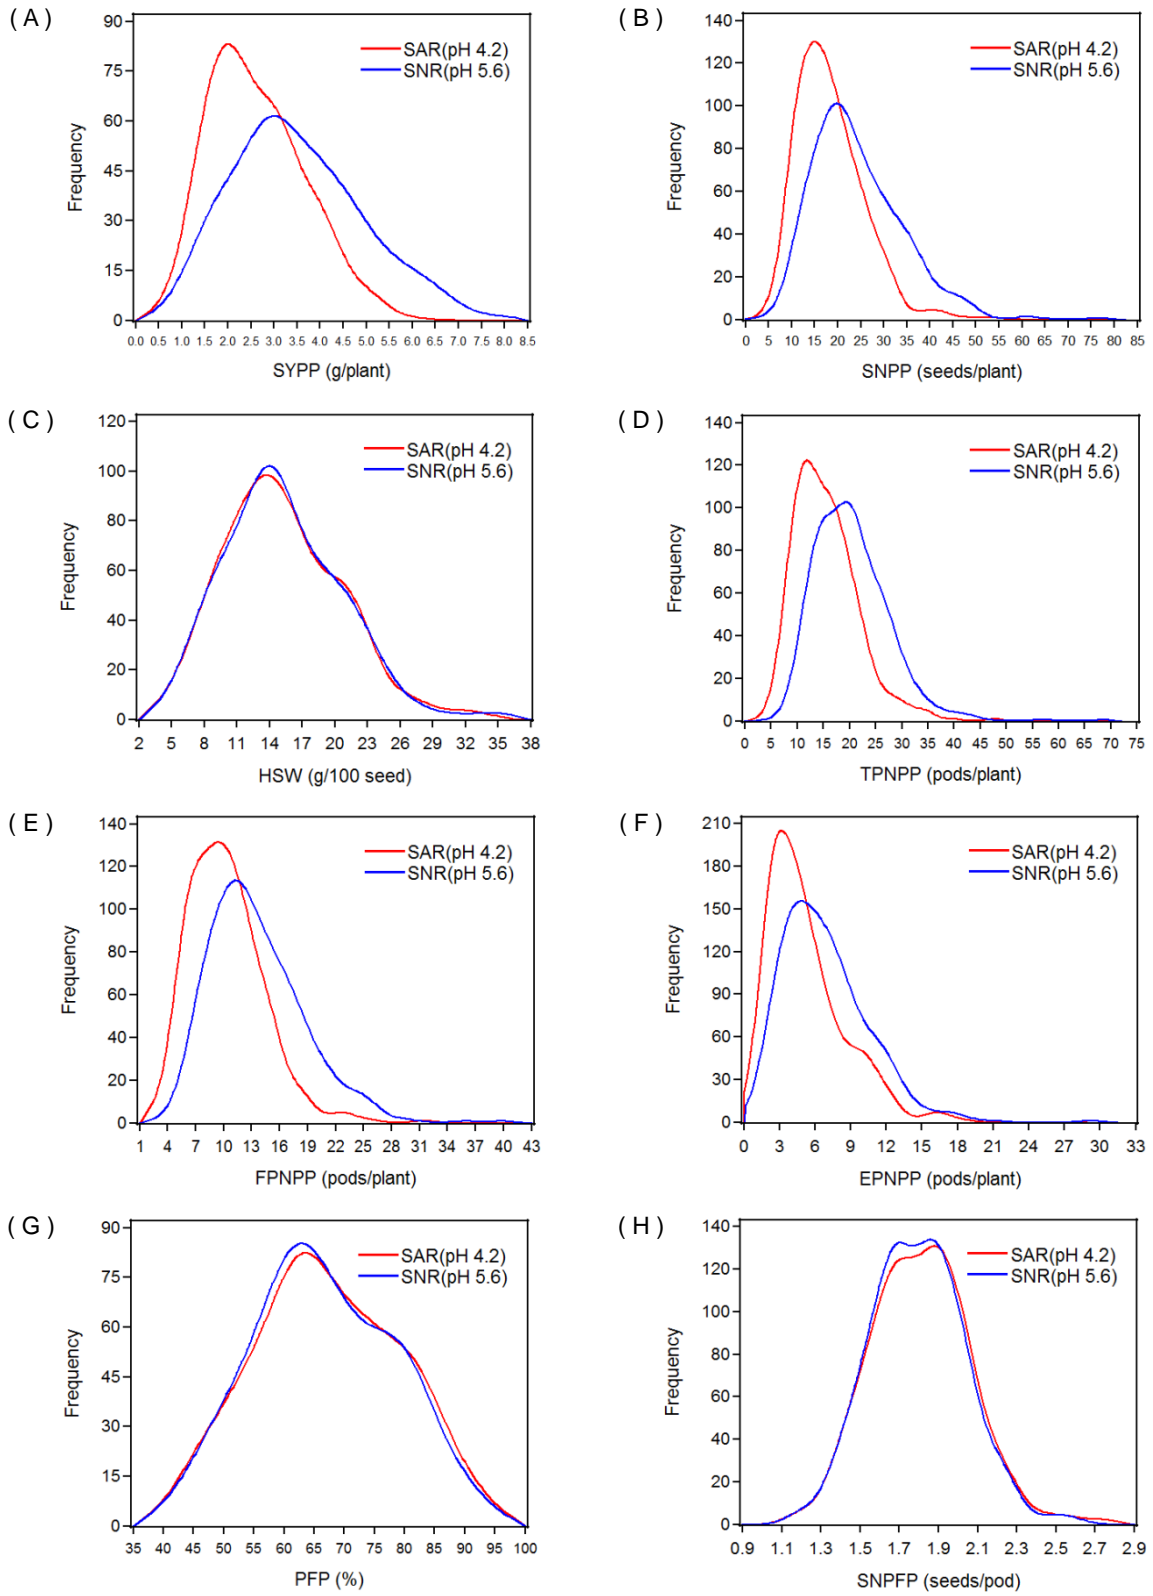

**Figure S1.** Frequency distributions of the 14 traits potentially related to AR tolerance for the tested soybean population under the two simulated rain regimes.

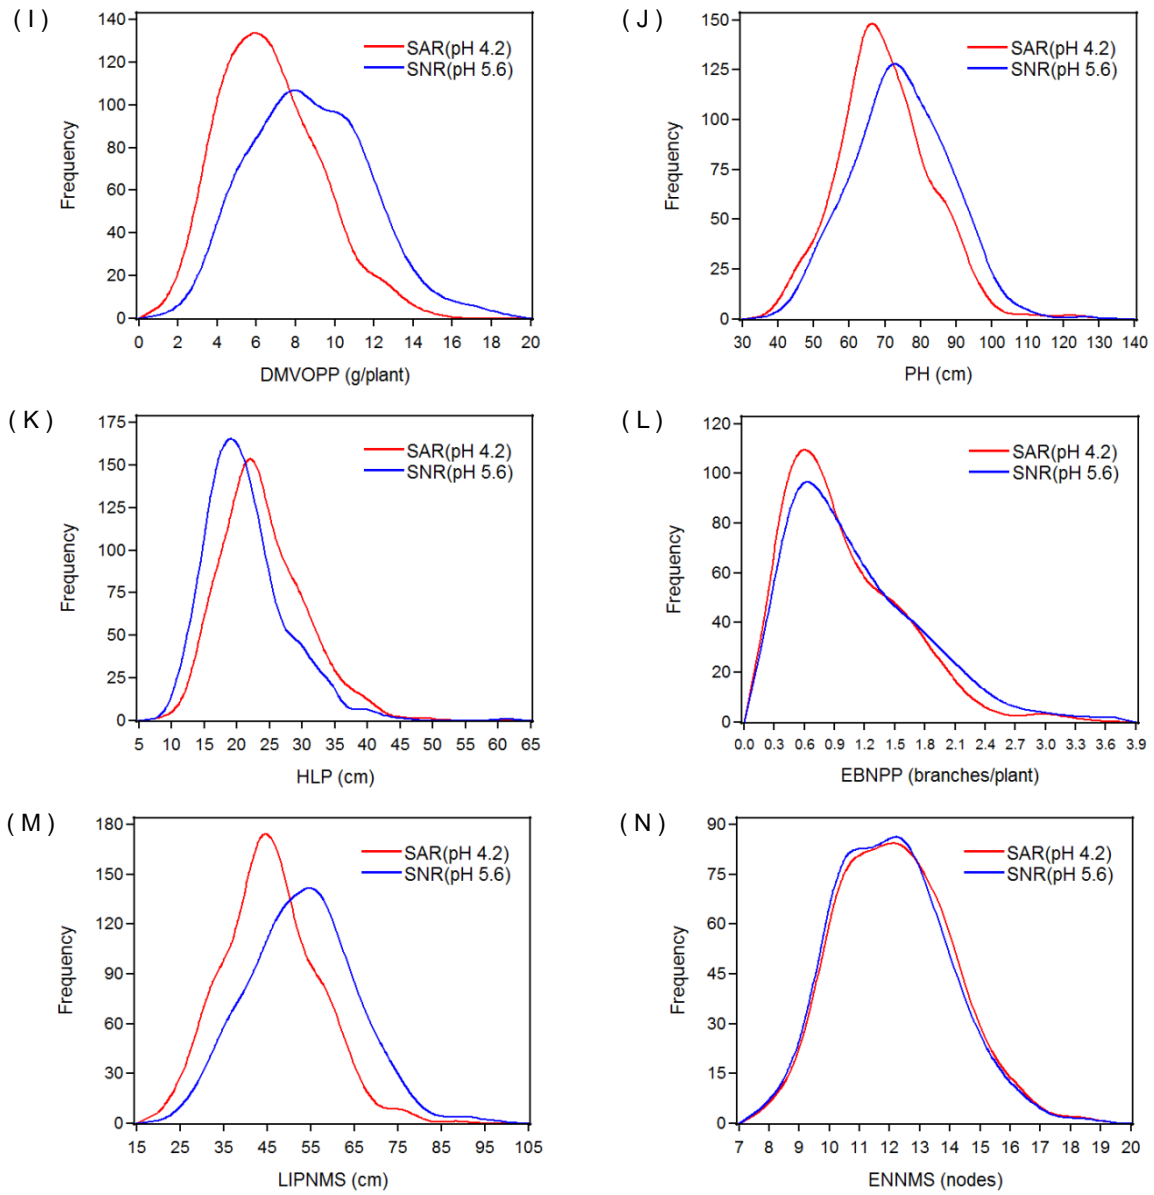

**Figure S1.** Frequency distributions of the 14 traits potentially related to AR tolerance for the tested soybean population under the two simulated rain regimes (continued).
